# Supplementary material for: N-Heterocyclic carbeneligands bearing hydrophilic and/or hydrophobic chains: Rh(i) and Pd(ii) complexes and their catalytic activity
Source: Royal Society of Chemistry journal article supplement (doi:10.1039/b715412g), 2007-11-22
Supplement: b715412g.pdf [file b715412g.pdf]

## Electronic supplementary information

### ***N*-Heterocyclic carbene ligands bearing hydrophilic and/or hydrophobic chains: Rh(I) and Pd(II) complexes and their catalytic activity**

Hidetoshi Ohta,<sup>a,b</sup> Tetsuaki Fujihara<sup>a</sup> and Yasushi Tsuji\*<sup>a</sup>

<sup>a</sup> Department of Energy and Hydrocarbon Chemistry, Graduate School of Engineering, Kyoto University, Kyoto 615-8510, Japan. <sup>b</sup> Division of Chemistry, Graduate School of Science, Hokkaido University, Sapporo 060-0810, Japan

\* To whom correspondence should be addressed.

Fax: +81-75-383-2514; Tel: +81-75-383-2515; E-mail: ytsuji@scl.kyoto-u.ac.jp

#### **<sup>1</sup>H NMR Spectral Data of [PdCl( $\eta^3$ -C<sub>3</sub>H<sub>5</sub>)(**1a-d**)].**

[PdCl( $\eta^3$ -C<sub>3</sub>H<sub>5</sub>)(**1a**)]: <sup>1</sup>H NMR (400 MHz, CDCl<sub>3</sub>):  $\delta$  6.86 (s, 2H, NHC), 6.59 (s, 4H, Ar), 5.31-5.16 (m, 5H, CH<sub>2</sub>-NHC + C<sub>3</sub>H<sub>5</sub>), 4.24 (d,  $J$  = 7.3 Hz, 1H, C<sub>3</sub>H<sub>5</sub>), 4.14-4.09 (m, 12H, OCH<sub>2</sub>), 3.82-3.75 (m, 12H, OCH<sub>2</sub>), 3.71-3.62 (m, 60H, OCH<sub>2</sub>), 3.54-3.52 (m, 12H, OCH<sub>2</sub>), 3.36-3.35 (m, 18H, OCH<sub>3</sub>), 3.20-3.15 (m, 2H, C<sub>3</sub>H<sub>5</sub>), 2.12 (d,  $J$  = 12.2 Hz, 1H, C<sub>3</sub>H<sub>5</sub>).

[PdCl( $\eta^3$ -C<sub>3</sub>H<sub>5</sub>)(**1b**)]: <sup>1</sup>H NMR (400 MHz, CDCl<sub>3</sub>):  $\delta$  6.87 (d,  $J$  = 2.0 Hz, 1H, NHC), 6.84 (d,  $J$  = 2.0 Hz, 1H, NHC), 6.60 (s, 2H, Ar), 6.53 (s, 2H, Ar), 5.33-5.15 (m, 5H, CH<sub>2</sub>-NHC + C<sub>3</sub>H<sub>5</sub>), 4.25 (d,  $J$  = 7.8 Hz, 1H, C<sub>3</sub>H<sub>5</sub>), 4.14-4.09 (m, 6H, OCH<sub>2</sub>), 3.95-3.89 (m, 6H, OCH<sub>2</sub>), 3.82-3.75 (m, 6H, OCH<sub>2</sub>), 3.70-3.61 (m, 30H, OCH<sub>2</sub>), 3.54-3.51 (m, 6H, OCH<sub>2</sub>), 3.36-3.35 (m, 9H, OCH<sub>3</sub>), 3.20-3.17 (m, 2H, C<sub>3</sub>H<sub>5</sub>), 2.10 (d,  $J$  = 12.2 Hz, 1H, C<sub>3</sub>H<sub>5</sub>), 1.79-1.68 (m, 6H, CH<sub>2</sub>), 1.45-1.41 (m, 6H, CH<sub>2</sub>), 1.35-1.22 (m, 48H, CH<sub>2</sub>), 0.87 (t,  $J$  = 6.8 Hz, 9H, CH<sub>3</sub>).

[PdCl( $\eta^3$ -C<sub>3</sub>H<sub>5</sub>)(**1c**)]: <sup>1</sup>H NMR (400 MHz, CDCl<sub>3</sub>):  $\delta$  6.86 (s, 2H, NHC), 6.52 (s, 4H, Ar), 5.33-5.16 (m, 5H, CH<sub>2</sub>-NHC + C<sub>3</sub>H<sub>5</sub>), 4.25 (d,  $J$  = 7.3 Hz, 1H, C<sub>3</sub>H<sub>5</sub>), 3.94-3.89 (m, 12H, OCH<sub>2</sub>), 3.20-3.15 (m, 2H, C<sub>3</sub>H<sub>5</sub>), 2.07 (d,  $J$  = 12.2 Hz, 1H, C<sub>3</sub>H<sub>5</sub>), 1.79-1.68 (m, 12H, CH<sub>2</sub>), 1.45-1.41 (m, 12H, CH<sub>2</sub>), 1.33-1.22 (m, 96H, CH<sub>2</sub>), 0.87 (t,  $J$  = 6.8 Hz, 18H, CH<sub>3</sub>).

[PdCl( $\eta^3$ -C<sub>3</sub>H<sub>5</sub>)(**1d**)]: <sup>1</sup>H NMR (400 MHz, CDCl<sub>3</sub>):  $\delta$  6.89 (s, 2H, NHC), 6.60 (s, 4H, Ar), 5.36-5.26 (m, 5H,

$CH_2-NHC + C_3H_5$ ), 4.27 (d,  $J = 7.7$  Hz, 1H,  $C_3H_5$ ), 3.83 (s, 12H,  $OCH_3$ ), 3.80 (s, 6H,  $OCH_3$ ), 3.27-3.12 (m, 2H,  $C_3H_5$ ), 2.15 (d,  $J = 11.8$  Hz, 1H,  $C_3H_5$ ).

### Calculation.

Optimized structures of **5a** and  $[PdCl(\eta^3-C_3H_5)(\mathbf{1a})]$  were obtained by ONIOM calculations.<sup>1</sup> In the ONIOM calculation, the molecular system of **5a** or  $[PdCl(\eta^3-C_3H_5)(\mathbf{1a})]$  was divided into two layers. The high layers were assigned to **5a** with a  $RhCl(COD)(C_3H_2N_2)$  core and  $[PdCl(\eta^3-C_3H_5)(\mathbf{1a})]$  with a  $PdCl(\eta^3-C_3H_5)(C_3H_2N_2)$  core for B3LYP<sup>2</sup>/LANL2DZ<sup>3</sup> calculation. The low layers contain the rest parts of **5a** and  $[PdCl(\eta^3-C_3H_5)(\mathbf{1a})]$  for molecular mechanics calculation using UFF force field.<sup>4</sup> All calculations were performed with the Gaussian 03 program<sup>5</sup> on a HIT HPC-IA642/SS 1.3/3D-4G.

### Optimized Structure of $[PdCl(\eta^3-C_3H_5)(\mathbf{1a})]$ Calculated by ONIOM Method.

At first, the molecular structure of  $[PdCl(\eta^3-C_3H_5)(\mathbf{1a})]$  was optimized with the TEG chains keeping anti conformations. The resulting optimized structure (local minimum) is shown in Figure S1(a). During the conformation analysis of  $[PdCl(\eta^3-C_3H_5)(\mathbf{1a})]$ , it was found that the significantly folded structure shown in Figure S1(b) is much more stable and close to global minimum: calculated energy difference between the structure in Figure S1(a) and S1(b) is 17.2 kcal mol<sup>-1</sup>.

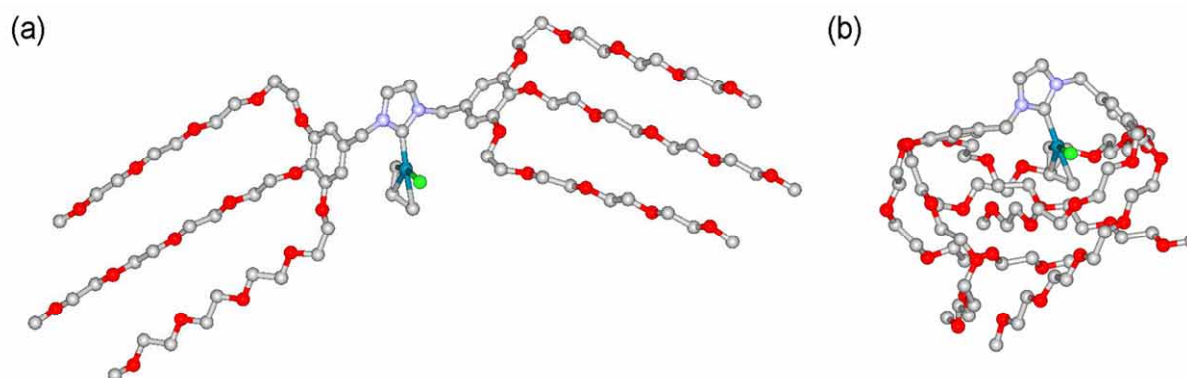

**Figure S1.** Optimized structures of  $[PdCl(\eta^3-C_3H_5)(\mathbf{1a})]$  [(a) extended and (b) folded structures] calculated by ONIOM (B3LYP/LANL2DZ:UFF).

## References

- (1) (a) F. Maseras and K. Morokuma, *J. Comput. Chem.* 1995, **16**, 1170-1179. (b) S. Humbel, S. Sieber and K. Morokuma, *J. Chem. Phys.* 1996, **105**, 1959-1967. (c) M. Svensson, S. Humbel, R. D. J. Froese, T. Matsubara, S. Sieber and K. Morokuma, *J. Phys. Chem.* 1996, **100**, 19357-19365.
- (2) A. D. Becke, *J. Chem. Phys.*, 1993, **98**, 5648-5652.
- (3) (a) P. J. Hay and W. R. Wadt, *J. Chem. Phys.*, 1985, **82**, 270-283. (b) W. R. Wadt and P. J. Hay, *J. Chem. Phys.*, 1985, **82**, 284-298. (c) P. J. Hay and W. R. Wadt, *J. Chem. Phys.*, 1985, **82**, 299-310.
- (4) A. K. Rappé, C. J. Casewit, K. S. Colwell, W. A. Goddard III and W. M. Skiff, *J. Am. Chem. Soc.*, 1992, **114**, 10024-10035.
- (5) Gaussian 03, Revision C.02, M. J. Frisch, G. W. Trucks, H. B. Schlegel, G. E. Scuseria, M. A. Robb, J. R. Cheeseman, J. A. Montgomery, Jr., T. Vreven, K. N. Kudin, J. C. Burant, J. M. Millam, S. S. Iyengar, J. Tomasi, V. Barone, B. Mennucci, M. Cossi, G. Scalmani, N. Rega, G. A. Petersson, H. Nakatsuji, M. Hada, M. Ehara, K. Toyota, R. Fukuda, J. Hasegawa, M. Ishida, T. Nakajima, Y. Honda, O. Kitao, H. Nakai, M. Klene, X. Li, J. E. Knox, H. P. Hratchian, J. B. Cross, C. Adamo, J. Jaramillo, R. Gomperts, R. E. Stratmann, O. Yazyev, A. J. Austin, R. Cammi, C. Pomelli, J. W. Ochterski, P. Y. Ayala, K. Morokuma, G. A. Voth, P. Salvador, J. J. Dannenberg, V. G. Zakrzewski, S. Dapprich, A. D. Daniels, M. C. Strain, O. Farkas, D. K. Malick, A. D. Rabuck, K. Raghavachari, J. B. Foresman, J. V. Ortiz, Q. Cui, A. G. Baboul, S. Clifford, J. Cioslowski, B. B. Stefanov, G. Liu, A. Liashenko, P. Piskorz, I. Komaromi, R. L. Martin, D. J. Fox, T. Keith, M. A. Al-Laham, C. Y. Peng, A. Nanayakkara, M. Challacombe, P. M. W. Gill, B. Johnson, W. Chen, M. W. Wong, C. Gonzalez and J. A. Pople, Gaussian, Inc., Wallingford CT, 2004.
